# Supplementary material for: Simultaneous determination of 41 components in Gualou Guizhi granules by UPLC coupled with triple quadrupole mass spectrometry
Source: Royal Society of Chemistry journal article supplement (doi:10.1039/c5ay01336d), 2015-01-01
Supplement: c5ay01336d1.pdf [file c5ay01336d1.pdf]

Table S1 Related data from some references

| References                                                                                                                                                                                                              | Analysis method | Target analytes                                                                                                                           | Analysis time / min | LOQ qualitative or              | flow rate mL·min <sup>-1</sup> |
|-------------------------------------------------------------------------------------------------------------------------------------------------------------------------------------------------------------------------|-----------------|-------------------------------------------------------------------------------------------------------------------------------------------|---------------------|---------------------------------|--------------------------------|
| [9]                                                                                                                                                                                                                     | HPLC-UV         | 1(Paeoniflorin)                                                                                                                           | 10.5                | 0.1 µg·mL <sup>-1</sup>         | 1.0                            |
| [10]                                                                                                                                                                                                                    | HPLC-DAD        | 6(paeoniflorin, glycyrrizin, liquiritin, cinnamic acid, cinnamaldehyde and glycyrrhizic acid)                                             | 65                  | 0.13-21 µg·mL <sup>-1</sup>     | 1.0                            |
| [11]                                                                                                                                                                                                                    | HPLC-UV         | 9(gallic acid, protocatechuic acid, albiflorin, paeoniflorin, glycyrrhizin, liquiritin, cinnamic acid, cinnamaldehyde, glycyrrhizic acid) | 105                 | 0.025-17.319 g·mL <sup>-1</sup> | 0.8                            |
| [12]                                                                                                                                                                                                                    | GC-MS           | volatile oils                                                                                                                             | 50                  | Only qualitative                | 1.0                            |
| Yuqin zhang, Huang Li, Mei Huang, Kedan Chu, Wei Xu, Shengnan Zhang, Jinhua Que, Lidian Chen. Neuroprotective effects of Gualou Guizhi Decoction in vivo and in vitro. Journal of Ethnopharmacology 2014, 158: 76 - 84. | HPLC-DAD        | 9 (gallic acid, protocatechuic acid, albiflorin, peoniflorin, liquiritigenin, liquiritin, cinnamaldehyde, cinnamic acid, glycyrrhizin)    | 105                 | Only qualitative                | 1.0                            |
| Our study                                                                                                                                                                                                               | UPLC-MS/MS      | 41(including 15 phenolic acids, 14 flavonoids, 4 monoterpene glycosides,                                                                  | 6.3                 | 0.12–70.9 ng/mL                 | 0.25                           |

|  |  |                                                     |  |  |  |
|--|--|-----------------------------------------------------|--|--|--|
|  |  | 4 triterpenes, 3 gingerols<br>and 1 galloyl glucose |  |  |  |
|--|--|-----------------------------------------------------|--|--|--|
