# Supplementary material for: Simultaneous determination of 41 components in Gualou Guizhi granules by UPLC coupled with triple quadrupole mass spectrometry
Source: Royal Society of Chemistry journal article supplement (doi:10.1039/c5ay01336d), 2015-01-01
Supplement: c5ay01336d2.pdf [file c5ay01336d2.pdf]

**Table 1** Retention time, related MS data of 41 investigated compounds and 4 internal standards in the UPLC-QqQ MS analysis.

| No. | Compounds                     | t <sub>R</sub><br>(min) | Precursor<br>ion( <i>m/z</i> ) | Daughter ion<br>( <i>m/z</i> ) | Cone voltage<br>(V) | Collision energy<br>(eV) |
|-----|-------------------------------|-------------------------|--------------------------------|--------------------------------|---------------------|--------------------------|
| 1   | Gallic acid                   | 1.20                    | 169.01                         | 125.02                         | 30                  | 15                       |
| 2   | protocatechuic acid           | 1.82                    | 153.01                         | 109.02                         | 30                  | 12                       |
| 3   | Neochlorogenic acid           | 1.83                    | 353.08                         | 191.05                         | 30                  | 22                       |
| 4   | Oxypaeoniflorin               | 2.37                    | 495.15                         | 137.02                         | 45                  | 30                       |
| 5   | Chlorogenic acid              | 2.45                    | 353.08                         | 191.05                         | 30                  | 22                       |
| 6   | Catechin                      | 2.48                    | 289.07                         | 245.08                         | 40                  | 15                       |
| 7   | Protocatechuic<br>aldehyde    | 2.50                    | 137.02                         | 109.02                         | 35                  | 15                       |
| 8   | <i>p</i> -hydroxybenzoic acid | 2.58                    | 137.02                         | 93.03                          | 25                  | 12                       |
| 9   | Methyl gallate                | 2.68                    | 183.03                         | 124.01                         | 35                  | 20                       |
| 10  | Vanillic acid                 | 3.06                    | 167.03                         | 123.04                         | 30                  | 10                       |
| 11  | Albiflorin                    | 3.67                    | 525.16                         | 121.02                         | 25                  | 25                       |
| 12  | Schaftoside                   | 3.83                    | 563.14                         | 443.09                         | 30                  | 28                       |
| 13  | Paeoniflorin                  | 3.90                    | 525.16                         | 121.02                         | 25                  | 28                       |
| 14  | 4-Hydroxycinnamic<br>acid     | 3.98                    | 137.02                         | 93.03                          | 30                  | 12                       |
| 15  | Rutin                         | 4.00                    | 609.14                         | 300.02                         | 35                  | 35                       |
| 16  | Ethyl gallate                 | 4.04                    | 197.04                         | 124.01                         | 35                  | 22                       |
| 17  | Liquirtin apioside            | 4.04                    | 549.16                         | 255.06                         | 45                  | 32                       |
| 18  | Pentagalloylglucose           | 4.06                    | 939.11                         | 769.09                         | 50                  | 32                       |
| 19  | Liquiritin                    | 4.07                    | 255.06                         | 135.01                         | 25                  | 20                       |
| 20  | Luteoloside                   | 4.08                    | 447.09                         | 285.04                         | 50                  | 28                       |
| 21  | Ferulic Acid                  | 4.15                    | 193.05                         | 134.03                         | 25                  | 15                       |
| 22  | Astragalin                    | 4.17                    | 447.09                         | 284.03                         | 35                  | 22                       |

|     |                        |       |          |          |    |    |
|-----|------------------------|-------|----------|----------|----|----|
| 23  | 3-Hydroxycinnamic acid | 4. 22 | 163. 03  | 119. 04  | 20 | 12 |
| 24  | Isoliquiritin apioside | 4. 26 | 549. 16  | 255. 06  | 45 | 28 |
| 25  | Isoliquiritin          | 4. 33 | 417. 12  | 255. 06  | 35 | 18 |
| 26  | 2-Hydroxycinnamic acid | 4. 38 | 163. 03  | 119. 04  | 20 | 10 |
| 27  | Ononin                 | 4. 40 | 475. 12  | 267. 06  | 22 | 15 |
| 28  | Liquiritigenin         | 4. 56 | 255. 06  | 135. 01  | 30 | 15 |
| 29  | Benzoylpaeoniflorin    | 4. 65 | 629. 18  | 121. 02  | 25 | 28 |
| 30  | Jujuboside A           | 4. 66 | 1205. 58 | 1073. 53 | 75 | 40 |
| 31  | Cinnamic acid          | 4. 77 | 147. 04  | 103. 05  | 15 | 10 |
| 32  | Formononetin           | 4. 80 | 267. 06  | 252. 03  | 40 | 20 |
| 33  | Jujuboside B           | 4. 81 | 1043. 53 | 911. 49  | 70 | 32 |
| 34  | 2-Methoxycinnamic acid | 4. 85 | 177. 05  | 133. 06  | 20 | 15 |
| 35  | Isoliquiritigenin      | 4. 91 | 255. 06  | 119. 05  | 30 | 22 |
| 36  | Glycyrrhizic acid      | 5. 02 | 821. 39  | 351. 05  | 75 | 35 |
| 37  | 6-Gingerol             | 5. 31 | 293. 17  | 99. 07   | 28 | 28 |
| 38  | licochalcone A         | 5. 42 | 337. 14  | 229. 08  | 47 | 25 |
| 39  | 8-Gingerol             | 5. 73 | 321. 21  | 127. 11  | 25 | 15 |
| 40  | 6-Shogaol              | 5. 84 | 275. 16  | 139. 11  | 45 | 25 |
| 41  | Glycyrrhetic acid      | 6. 22 | 469. 33  | 425. 34  | 80 | 32 |
| IS1 | Swertiamarin           | 2. 77 | 419. 11  | 179. 05  | 20 | 12 |
| IS2 | Nicotiflorin           | 4. 09 | 593. 15  | 285. 04  | 35 | 30 |
| IS3 | Methylparaben          | 4. 49 | 151. 03  | 92. 03   | 30 | 18 |
| IS4 | Ginsenoside Rb1        | 4. 50 | 1107. 59 | 1107. 59 | 75 | 2  |

**Table 2** Regression equation, LOD and LOQ of 41 analytes.

| Compounds                     | Regression equation     | $R^2$  | Linear range  | LOQ     | LOD     |
|-------------------------------|-------------------------|--------|---------------|---------|---------|
|                               |                         |        | (ng/mL)       | (ng/mL) | (ng/mL) |
| Gallic acid                   | $y = 0.3424x - 0.0012$  | 0.9980 | 0.051 - 10.01 | 6.84    | 2.95    |
| protocatechuic acid           | $y = 0.4506x + 0.0017$  | 0.9974 | 0.025 - 1.006 | 5.96    | 2.70    |
| Neochlorogenic acid           | $y = 0.1811x - 0.0020$  | 0.9982 | 0.020 - 0.800 | 14.74   | 4.22    |
| Oxypaeoniflorin               | $y = 1.0217x - 0.0015$  | 0.9954 | 0.025 - 1.003 | 0.59    | 0.22    |
| Chlorogenic acid              | $y = 0.3958x - 0.0102$  | 0.9972 | 0.050 - 2.002 | 14.03   | 4.32    |
| Catechin                      | $y = 0.1286x + 0.0005$  | 0.9980 | 0.102 - 2.945 | 10.34   | 5.43    |
| Protocatechuic aldehyde       | $y = 0.0517x - 0.0009$  | 0.9978 | 0.025 - 1.000 | 41.36   | 15.44   |
| <i>p</i> -hydroxybenzoic acid | $y = 1.0590x - 0.0132$  | 0.9964 | 0.025 - 1.000 | 7.10    | 2.44    |
| Methyl gallate                | $y = 1.5636x + 0.0106$  | 0.9998 | 0.025 - 1.000 | 5.76    | 2.47    |
| Vanillic acid                 | $y = 0.1878x + 0.0021$  | 0.9984 | 0.025 - 1.000 | 29.66   | 11.14   |
| Albiflorin                    | $y = 0.2883x + 0.0009$  | 0.9962 | 0.198 - 59.85 | 5.42    | 1.73    |
| Schaftoside                   | $y = 0.2428x - 0.0011$  | 0.9940 | 0.025 - 1.000 | 44.90   | 21.31   |
| Paeoniflorin                  | $y = 0.4427x + 0.0023$  | 0.9978 | 0.225 - 89.40 | 11.10   | 3.32    |
| 4-Hydroxycinnamic acid        | $y = 1.1543x + 0.0058$  | 0.9966 | 0.025 - 1.000 | 20.19   | 4.54    |
| Rutin                         | $y = 0.5642x - 0.0028$  | 0.9968 | 0.025 - 1.000 | 3.90    | 1.27    |
| Ethyl gallate                 | $y = 1.5278x + 0.0025$  | 0.9972 | 0.025 - 0.991 | 5.61    | 2.19    |
| Liquirtin apioside            | $y = 1.5621x + 0.0032$  | 0.9992 | 0.051 - 4.020 | 0.46    | 0.14    |
| Pentagalloylglucose           | $y = 0.1475x - 0.0023$  | 0.9964 | 0.253 - 20.33 | 50.34   | 22.19   |
| Liquiritin                    | $y = 1.4964x + 0.0108$  | 0.9946 | 0.050 - 10.04 | 0.11    | 0.03    |
| Luteoloside                   | $y = 1.7803x + 0.0090$  | 0.9984 | 0.025 - 0.998 | 3.11    | 0.94    |
| Ferulic Acid                  | $y = 0.4548x - 0.00090$ | 0.9970 | 0.025 - 0.993 | 21.52   | 8.17    |
| Astragalin                    | $y = 0.8418x - 0.00110$ | 0.9958 | 0.020 - 1.001 | 2.14    | 0.73    |
| 3-Hydroxycinnamic acid        | $y = 1.2248x + 0.0128$  | 0.9990 | 0.021 - 1.001 | 10.31   | 2.57    |
| Isoliquiritin apioside        | $y = 1.5884x + 0.0119$  | 0.9972 | 0.058 - 3.016 | 0.88    | 0.36    |
| Isoliquiritin                 | $y = 1.9590x + 0.0010$  | 0.9920 | 0.052 - 4.021 | 0.81    | 0.26    |
| 2-Hydroxycinnamic acid        | $y = 1.6128x + 0.0032$  | 0.9982 | 0.025 - 1.005 | 10.14   | 2.54    |
| Ononin                        | $y = 0.1177x - 0.0033$  | 0.9892 | 0.050 - 6.046 | 50.61   | 20.26   |
| Liquiritigenin                | $y = 2.4218x + 0.0025$  | 0.9988 | 0.051 - 5.008 | 0.55    | 0.20    |
| Benzoylpaeoniflorin           | $y = 0.9167x - 0.0089$  | 0.9976 | 0.018 - 1.781 | 1.66    | 0.87    |

|                        |                        |        |               |       |       |
|------------------------|------------------------|--------|---------------|-------|-------|
| Jujuboside A           | $y = 0.2999x - 0.0007$ | 0.9845 | 0.020 - 0.803 | 31.32 | 10.40 |
| Cinnamic acid          | $y = 0.0194x - 0.0014$ | 0.9932 | 0.050 - 2.006 | 69.57 | 28.89 |
| Formononetin           | $y = 6.0555x - 0.0743$ | 0.9926 | 0.040 - 0.800 | 2.22  | 0.67  |
| Jujuboside B           | $y = 0.7689x + 0.0125$ | 0.9964 | 0.020 - 0.800 | 38.61 | 11.47 |
| 2-Methoxycinnamic acid | $y = 0.0854x - 0.0038$ | 0.9974 | 0.020 - 0.800 | 46.42 | 20.18 |
| Isoliquiritigenin      | $y = 2.4524x - 0.0227$ | 0.9982 | 0.051 - 2.011 | 0.93  | 0.36  |
| Glycyrrhizic acid      | $y = 0.2408x - 0.0021$ | 0.9956 | 0.250 - 75.00 | 29.82 | 10.67 |
| 6-Gingerol             | $y = 0.0796x - 0.0008$ | 0.9958 | 0.050 - 0.999 | 34.17 | 12.06 |
| licochalcone A         | $y = 0.1085x - 0.0022$ | 0.9956 | 0.025 - 0.503 | 29.43 | 10.29 |
| 8-Gingerol             | $y = 0.6388x - 0.0051$ | 0.9841 | 0.020 - 0.500 | 19.54 | 5.98  |
| 6-Shogaol              | $y = 0.0254x + 0.0010$ | 0.9890 | 0.030 - 0.599 | 36.21 | 19.34 |
| Glycyrrhetic acid      | $y = 1.0214x - 0.0108$ | 0.9948 | 0.025 - 0.500 | 15.74 | 5.95  |

---

**Table 3** Precision, stability and repeatability of 41 analytes.

| compounds                     | Precision (RSD, %, <i>n</i> =3) |           | Stability<br>(RSD, %, <i>n</i> =6) | Repeatability<br>(RSD, %, <i>n</i> =6) |
|-------------------------------|---------------------------------|-----------|------------------------------------|----------------------------------------|
|                               | Intra-day                       | Inter-day |                                    |                                        |
| Gallic acid                   | 2.38%                           | 2.51%     | 2.30%                              | 3.81%                                  |
| protocatechuic acid           | 2.59%                           | 1.63%     | 3.28%                              | 2.77%                                  |
| Neochlorogenic acid           | 2.97%                           | 2.72%     | 2.50%                              | 3.23%                                  |
| Oxypaeoniflorin               | 3.15%                           | 3.76%     | 2.40%                              | 4.27%                                  |
| Chlorogenic acid              | 3.05%                           | 2.29%     | 3.07%                              | 3.23%                                  |
| Catechin                      | 2.67%                           | 3.73%     | 2.18%                              | 2.16%                                  |
| Protocatechuic aldehyde       | 3.55%                           | 2.19%     | 3.55%                              | 2.77%                                  |
| <i>p</i> -hydroxybenzoic acid | 2.96%                           | 3.69%     | 3.37%                              | 4.04%                                  |
| Methyl gallate                | 2.98%                           | 3.86%     | 2.18%                              | 2.96%                                  |
| Vanillic acid                 | 3.58%                           | 2.31%     | 2.97%                              | 2.77%                                  |
| Albiflorin                    | 3.56%                           | 3.69%     | 3.26%                              | 4.04%                                  |
| Schaftoside                   | 2.38%                           | 3.51%     | 2.96%                              | 2.85%                                  |
| Paeoniflorin                  | 3.09%                           | 2.69%     | 3.70%                              | 2.27%                                  |
| 4-Hydroxycinnamic acid        | 1.96%                           | 3.12%     | 2.54%                              | 2.88%                                  |
| Rutin                         | 2.47%                           | 2.31%     | 3.53%                              | 2.19%                                  |
| Ethyl gallate                 | 2.84%                           | 2.18%     | 3.32%                              | 2.60%                                  |
| Liquirtin apioside            | 2.59%                           | 1.75%     | 2.28%                              | 2.63%                                  |
| Pentagalloylglucose           | 2.57%                           | 3.71%     | 2.76%                              | 3.05%                                  |

|                        |       |       |       |       |
|------------------------|-------|-------|-------|-------|
| Liquiritin             | 1.97% | 2.51% | 1.78% | 4.06% |
| Luteoloside            | 3.74% | 3.23% | 2.53% | 3.85% |
| Ferulic Acid           | 3.32% | 3.95% | 2.56% | 3.14% |
| Astragalin             | 1.56% | 3.61% | 3.91% | 2.54% |
| 3-Hydroxycinnamic acid | 3.16% | 3.17% | 2.56% | 4.06% |
| Isoliquiritin apioside | 3.84% | 2.97% | 3.71% | 2.48% |
| Isoliquiritin          | 2.04% | 2.18% | 3.28% | 4.66% |
| 2-Hydroxycinnamic acid | 3.46% | 3.02% | 2.33% | 2.87% |
| Ononin                 | 3.30% | 2.51% | 1.48% | 4.66% |
| Liquiritigenin         | 2.03% | 2.08% | 3.16% | 2.15% |
| Benzoylpaeoniflorin    | 2.02% | 3.46% | 2.41% | 3.47% |
| Jujuboside A           | 3.42% | 3.30% | 3.32% | 3.23% |
| Cinnamic acid          | 2.97% | 3.55% | 3.63% | 2.03% |
| Formononetin           | 2.58% | 3.70% | 2.27% | 2.65% |
| Jujuboside B           | 1.87% | 3.22% | 2.57% | 2.48% |
| 2-Methoxycinnamic acid | 2.22% | 3.90% | 4.12% | 3.66% |
| Isoliquiritigenin      | 2.94% | 2.81% | 2.07% | 2.87% |
| Glycyrrhizic acid      | 2.90% | 2.88% | 2.90% | 4.06% |
| 6-Gingerol             | 2.86% | 3.11% | 2.28% | 2.15% |
| licochalcone A         | 3.26% | 3.95% | 2.18% | 3.41% |
| 8-Gingerol             | 2.39% | 1.88% | 3.63% | 3.48% |
| 6-Shogaol              | 2.59% | 3.46% | 3.22% | 2.51% |

|                   |       |       |       |       |
|-------------------|-------|-------|-------|-------|
| Glycyrrhetic acid | 2.14% | 3.74% | 3.22% | 3.52% |
|-------------------|-------|-------|-------|-------|

---

**Table 4** Recovery data of the proposed method ( $n = 3$ )

| Compounds                     | Original (mg) | Added (mg) | Detected (mg) | Recovery (%) | RSD (%) |
|-------------------------------|---------------|------------|---------------|--------------|---------|
| Gallic acid                   | 91.69         | 80.02      | 169.58 ± 5.85 | 97.35%       | 3.45%   |
|                               |               | 100.02     | 194.76 ± 2.85 | 103.05%      | 2.46%   |
|                               |               | 120.02     | 210.69 ± 3.75 | 99.15%       | 2.78%   |
| protocatechuic acid           | 3.53          | 3.21       | 6.71 ± 0.36   | 98.95%       | 5.33%   |
|                               |               | 4.01       | 7.54 ± 0.17   | 99.95%       | 2.30%   |
|                               |               | 4.81       | 8.52 ± 0.43   | 103.66%      | 5.02%   |
| Neochlorogenic acid           | 5.28          | 4.02       | 9.23 ± 0.23   | 98.45%       | 2.51%   |
|                               |               | 5.02       | 10.39 ± 0.16  | 101.75%      | 2.57%   |
|                               |               | 6.02       | 11.5 ± 0.29   | 103.25%      | 2.51%   |
| Oxypaeoniflorin               | 5.59          | 4.03       | 9.6 ± 0.37    | 99.60%       | 3.87%   |
|                               |               | 5.04       | 10.77 ± 0.41  | 102.95%      | 3.76%   |
|                               |               | 6.05       | 11.76 ± 0.26  | 102.05%      | 2.20%   |
| Chlorogenic acid              | 10.34         | 8.06       | 18.75 ± 1.24  | 104.36%      | 3.59%   |
|                               |               | 10.08      | 20.36 ± 1.21  | 99.45%       | 4.96%   |
|                               |               | 12.10      | 22.68 ± 0.57  | 102.05%      | 2.51%   |
| Catechin                      | 43.06         | 40.03      | 82.53 ± 2.85  | 98.59%       | 3.45%   |
|                               |               | 50.04      | 91.95 ± 2.98  | 97.71%       | 3.24%   |
|                               |               | 60.05      | 101.26 ± 5.19 | 96.93%       | 4.12%   |
| Protocatechuic aldehyde       | 5.83          | 4.02       | 9.71 ± 0.13   | 96.44%       | 2.36%   |
|                               |               | 5.03       | 11.04 ± 0.35  | 103.66%      | 3.14%   |
|                               |               | 6.04       | 11.87 ± 0.36  | 100.15%      | 3.03%   |
| <i>p</i> -hydroxybenzoic acid | 5.89          | 4.03       | 9.99 ± 0.63   | 101.85%      | 3.27%   |
|                               |               | 5.04       | 10.73 ± 0.27  | 96.05%       | 2.50%   |
|                               |               | 6.05       | 11.84 ± 0.27  | 98.40%       | 2.29%   |
| Methyl gallate                | 7.66          | 6.42       | 13.75 ± 0.47  | 94.98%       | 3.44%   |
|                               |               | 8.02       | 15.72 ± 0.23  | 100.55%      | 3.46%   |
|                               |               | 9.62       | 16.97 ± 0.78  | 96.74%       | 4.60%   |
| Vanillic acid                 | 5.08          | 4.01       | 9.13 ± 0.35   | 101.05%      | 3.87%   |
|                               |               | 5.01       | 10.04 ± 0.30  | 99.15%       | 3.03%   |
|                               |               | 6.01       | 11.10 ± 0.56  | 100.15%      | 5.02%   |
| Albiflorin                    | 1053.36       | 801        | 1848.1 ± 48.3 | 99.35%       | 2.61%   |



|                        |        |       |             |         |       |
|------------------------|--------|-------|-------------|---------|-------|
|                        |        | 1002  | 2041.8±35.0 | 98.85%  | 2.57% |
|                        |        | 1204  | 2294.8±38.6 | 103.46% | 2.46% |
| Schaftoside            | 31.58  | 24.02 | 56.11±3.23  | 102.15% | 5.05% |
|                        |        | 30.02 | 62.58±1.37  | 103.25% | 2.20% |
|                        |        | 36.02 | 66.97±1.54  | 98.25%  | 2.30% |
| Paeoniflorin           | 825.72 | 643   | 1452.4±62.2 | 97.93%  | 4.29% |
|                        |        | 804   | 1602.9±46.9 | 97.16%  | 2.93% |
|                        |        | 965   | 1743.6±56.5 | 95.62%  | 3.24% |
| 4-Hydroxycinnamic acid | 5.22   | 4.01  | 9.21±0.29   | 99.66%  | 3.13% |
|                        |        | 5.01  | 10.08±0.43  | 97.16%  | 4.27% |
|                        |        | 6.01  | 10.96±0.32  | 95.52%  | 2.92% |
| Rutin                  | 7.88   | 6.45  | 13.91±0.45  | 93.59%  | 3.23% |
|                        |        | 8.06  | 16.12±0.52  | 102.25% | 3.23% |
|                        |        | 9.67  | 17.57±0.64  | 100.15% | 3.66% |
| Ethyl gallate          | 2.57   | 2.01  | 4.63±0.30   | 102.75% | 3.38% |
|                        |        | 2.51  | 5.07±0.16   | 99.55%  | 3.09% |
|                        |        | 3.01  | 5.59±0.11   | 100.15% | 2.93% |
| Liquirtin apioside     | 58.07  | 48.01 | 106.14±2.78 | 100.25% | 2.61% |
|                        |        | 60.02 | 115.23±4.70 | 95.27%  | 4.08% |
|                        |        | 72.03 | 127.09±5.58 | 95.86%  | 4.39% |
| Pentagalloylglucose    | 60.37  | 48.10 | 106.29±4.32 | 95.66%  | 4.07% |
|                        |        | 60.20 | 121.73±3.95 | 102.25% | 3.24% |
|                        |        | 72.30 | 131.26±4.38 | 98.45%  | 3.34% |
| Liquiritin             | 73.67  | 64.02 | 135.45±4.53 | 96.54%  | 3.35% |
|                        |        | 80.03 | 151.84±6.49 | 97.71%  | 4.27% |
|                        |        | 96.04 | 171.83±3.76 | 102.25% | 2.19% |
| Luteoloside            | 3.61   | 3.21  | 6.70±0.17   | 96.29%  | 2.61% |
|                        |        | 4.01  | 7.66±0.34   | 101.05% | 4.38% |
|                        |        | 4.81  | 8.31±0.15   | 97.65%  | 2.77% |
| Ferulic Acid           | 7.83   | 6.42  | 14.22±0.57  | 99.66%  | 3.97% |
|                        |        | 8.02  | 15.70±0.39  | 98.11%  | 2.50% |
|                        |        | 9.62  | 17.45±0.67  | 99.96%  | 3.86% |
| Astragalin             | 3.78   | 3.22  | 7.04±0.18   | 101.35% | 2.61% |
|                        |        | 4.02  | 7.90±0.30   | 102.45% | 3.75% |
|                        |        | 4.82  | 8.42±0.18   | 96.05%  | 2.19% |
| 3-Hydroxycinnamic acid | 2.64   | 2.42  | 5.02±0.08   | 98.59%  | 2.68% |

|                        |       |       |             |         |       |
|------------------------|-------|-------|-------------|---------|-------|
|                        |       | 3.02  | 5.68±0.22   | 100.74% | 3.87% |
|                        |       | 3.62  | 6.25±0.14   | 99.77%  | 2.19% |
| Isoliquiritin apioside | 31.66 | 24.02 | 55.39±3.93  | 98.89%  | 3.09% |
|                        |       | 30.03 | 62.01±2.84  | 101.13% | 3.59% |
|                        |       | 36.04 | 66.77±2.58  | 97.52%  | 3.86% |
| Isoliquiritin          | 35.46 | 24.01 | 59.74±4.62  | 101.13% | 2.73% |
|                        |       | 30.02 | 63.95±4.04  | 94.94%  | 2.31% |
|                        |       | 36.03 | 71.99±1.65  | 101.45% | 2.29% |
| 2-Hydroxycinnamic acid | 6.29  | 4.04  | 10.27±0.34  | 98.59%  | 3.34% |
|                        |       | 5.05  | 11.19±0.28  | 97.03%  | 2.50% |
|                        |       | 6.06  | 12.40±0.19  | 100.94% | 2.56% |
| Ononin                 | 57.05 | 48.01 | 104.89±3.61 | 99.67%  | 3.44% |
|                        |       | 60.02 | 115.10±3.48 | 96.74%  | 3.02% |
|                        |       | 72.03 | 126.21±6.32 | 96.05%  | 5.00% |
| Liquiritigenin         | 30.78 | 24.03 | 54.64±1.83  | 99.28%  | 3.35% |
|                        |       | 30.04 | 61.05±1.92  | 100.74% | 3.14% |
|                        |       | 36.05 | 66.01±1.66  | 97.71%  | 2.51% |
| Benzoylpaeoniflorin    | 17.20 | 16.02 | 33.26±0.77  | 100.26% | 2.30% |
|                        |       | 20.03 | 36.65±0.57  | 97.13%  | 2.56% |
|                        |       | 24.04 | 40.68±0.59  | 97.71%  | 2.46% |
| Jujuboside A           | 2.60  | 2.01  | 4.60±0.12   | 99.77%  | 2.61% |
|                        |       | 2.51  | 5.16±0.25   | 101.75% | 4.77% |
|                        |       | 3.01  | 5.58±0.28   | 98.98%  | 5.00% |
| Cinnamic acid          | 19.64 | 16.01 | 35.47±1.41  | 98.89%  | 3.96% |
|                        |       | 20.01 | 39.23±1.23  | 97.91%  | 3.13% |
|                        |       | 24.01 | 43.22±1.58  | 98.20%  | 3.65% |
| Formononetin           | 9.73  | 8.03  | 17.31±0.31  | 94.31%  | 2.80% |
|                        |       | 10.04 | 19.83±0.91  | 100.55% | 3.57% |
|                        |       | 12.05 | 21.75±1.09  | 99.77%  | 4.94% |
| Jujuboside B           | 2.64  | 2.00  | 4.65±0.13   | 100.45% | 2.83% |
|                        |       | 2.50  | 5.13±0.27   | 99.57%  | 5.18% |
|                        |       | 3.00  | 5.70±0.08   | 101.82% | 2.36% |
| 2-Methoxycinnamic acid | 1.64  | 1.61  | 3.20±0.10   | 96.96%  | 3.02% |
|                        |       | 2.01  | 3.55±0.11   | 95.04%  | 3.23% |
|                        |       | 2.41  | 4.04±0.21   | 99.38%  | 4.32% |
| Isoliquiritigenin      | 4.92  | 4.02  | 8.72±0.20   | 94.65%  | 2.29% |

|                   |        |        |             |         |       |
|-------------------|--------|--------|-------------|---------|-------|
|                   |        | 5.02   | 9.90±0.31   | 99.28%  | 3.18% |
|                   |        | 6.02   | 10.88±0.21  | 98.99%  | 2.03% |
| Glycyrrhizic acid | 673.37 | 520.11 | 1189.6±45.6 | 99.28%  | 3.36% |
|                   |        | 650.22 | 1312.4±39.6 | 98.31%  | 3.02% |
|                   |        | 780.52 | 1433.4±53.5 | 97.45%  | 3.74% |
| 6-Gingerol        | 8.90   | 8.02   | 16.88±0.42  | 99.57%  | 2.50% |
|                   |        | 10.02  | 18.54±1.05  | 96.29%  | 5.17% |
|                   |        | 12.02  | 21.00±0.78  | 100.65% | 3.74% |
| licochalcone A    | 4.85   | 4.01   | 8.87±0.35   | 100.45% | 3.99% |
|                   |        | 5.01   | 9.81±0.3    | 99.08%  | 3.03% |
|                   |        | 6.01   | 10.58±0.45  | 95.33%  | 4.29% |
| 8-Gingerol        | 4.41   | 4.02   | 8.23±0.18   | 95.14%  | 2.20% |
|                   |        | 5.02   | 9.24±0.24   | 96.10%  | 2.61% |
|                   |        | 6.02   | 10.4±0.44   | 99.47%  | 4.25% |
| 6-Shogaol         | 2.05   | 1.61   | 3.63±0.14   | 98.22%  | 3.99% |
|                   |        | 2.01   | 4.02±0.13   | 98.01%  | 3.73% |
|                   |        | 2.41   | 4.49±0.18   | 101.35% | 4.25% |
| Glycyrrhetic acid | 3.18   | 2.42   | 5.61±0.29   | 100.35% | 5.11% |
|                   |        | 3.02   | 6.13±0.22   | 97.71%  | 3.61% |
|                   |        | 3.62   | 6.73±0.34   | 98.05%  | 5.03% |

---

**Table 5** Contents of 41 investigated compounds in 10 batches of GLGZG samples.

| Samples |                | Content of each compound in 10 batches of GLGZG samples (mg/g) |        |        |        |        |        |        |        |        |        |        |        |        |        |
|---------|----------------|----------------------------------------------------------------|--------|--------|--------|--------|--------|--------|--------|--------|--------|--------|--------|--------|--------|
| No.     | 1 <sup>a</sup> | 2                                                              | 3      | 4      | 5      | 6      | 7      | 8      | 9      | 10     | 11     | 12     | 13     | 14     | 15     |
| Lot.1   | 0.3668         | 0.0141                                                         | 0.0211 | 0.0223 | 0.0414 | 0.1722 | 0.0233 | 0.0236 | 0.0306 | 0.0203 | 4.2135 | 0.1263 | 3.3029 | 0.0209 | 0.0315 |
| Lot.2   | 0.4505         | 0.0451                                                         | 0.0158 | 0.0391 | 0.0520 | 0.3329 | 0.0329 | 0.0247 | 0.0517 | 0.0372 | 3.8554 | 0.3721 | 2.0436 | 0.0355 | 0.0224 |
| Lot.3   | 0.5145         | 0.0391                                                         | 0.0298 | 0.0842 | 0.0227 | 0.3860 | 0.0501 | 0.0539 | 0.0233 | 0.0457 | 5.3533 | 0.3847 | 3.3720 | 0.0200 | 0.0549 |
| Lot.4   | 0.4649         | 0.0431                                                         | 0.0500 | 0.0440 | 0.0992 | 0.1884 | 0.0190 | 0.0494 | 0.0507 | 0.0525 | 2.5668 | 0.1363 | 4.1794 | 0.0360 | 0.0193 |
| Lot.5   | 0.3114         | 0.0454                                                         | 0.0365 | 0.0440 | 0.0482 | 0.0541 | 0.0363 | 0.0221 | 0.0401 | 0.0120 | 4.9094 | 0.3068 | 5.8907 | 0.0268 | 0.0590 |
| Lot.6   | 0.4128         | 0.0245                                                         | 0.0422 | 0.0548 | 0.0438 | 0.3223 | 0.0244 | 0.0158 | 0.0286 | 0.0318 | 2.8039 | 0.0271 | 2.4306 | 0.0357 | 0.0488 |
| Lot.7   | 0.4403         | 0.0330                                                         | 0.0461 | 0.0665 | 0.0779 | 0.3959 | 0.0449 | 0.0682 | 0.0355 | 0.0345 | 5.3634 | 0.3055 | 4.4683 | 0.0525 | 0.0428 |
| Lot.8   | 0.2557         | 0.0270                                                         | 0.0202 | 0.0400 | 0.0526 | 0.2381 | 0.0380 | 0.0422 | 0.0549 | 0.0257 | 2.5763 | 0.2889 | 5.1166 | 0.0247 | 0.0229 |
| Lot.9   | 0.3223         | 0.0182                                                         | 0.0271 | 0.0521 | 0.0388 | 0.1587 | 0.0268 | 0.0306 | 0.0643 | 0.0413 | 3.6806 | 0.1402 | 1.0185 | 0.0418 | 0.0564 |

|              |        |        |        |        |        |        |        |        |        |        |        |        |        |        |        |
|--------------|--------|--------|--------|--------|--------|--------|--------|--------|--------|--------|--------|--------|--------|--------|--------|
| Lot.10       | 0.3344 | 0.0125 | 0.0219 | 0.0211 | 0.0673 | 0.3279 | 0.0415 | 0.0258 | 0.0344 | 0.0356 | 4.4396 | 0.2360 | 1.2556 | 0.0456 | 0.0287 |
| <i>Aver.</i> | 0.4230 | 0.0302 | 0.0311 | 0.0468 | 0.0530 | 0.2577 | 0.0337 | 0.0356 | 0.0414 | 0.0334 | 3.9762 | 0.2320 | 3.3078 | 0.0339 | 0.0387 |

<sup>a</sup> The compound numbers are the same as in Fig. 1.

| Samples | Content of each compound in 10 batches of GZD samples (mg/g) |        |        |        |        |        |        |        |        |        |        |        |        |        |        |
|---------|--------------------------------------------------------------|--------|--------|--------|--------|--------|--------|--------|--------|--------|--------|--------|--------|--------|--------|
|         | No.                                                          | 16     | 17     | 18     | 19     | 20     | 21     | 22     | 23     | 24     | 25     | 26     | 27     | 28     | 29     |
| Lot.1   | 0.0103                                                       | 0.2323 | 0.2415 | 0.2947 | 0.0145 | 0.0313 | 0.0151 | 0.0105 | 0.1266 | 0.1419 | 0.0251 | 0.2282 | 0.1231 | 0.0688 | 0.0104 |
| Lot.2   | 0.0292                                                       | 0.3732 | 0.6859 | 0.6645 | 0.0129 | 0.0591 | 0.0290 | 0.0284 | 0.0881 | 0.2854 | 0.0537 | 0.4772 | 0.2750 | 0.1383 | 0.0193 |
| Lot.3   | 0.0130                                                       | 0.4786 | 0.2941 | 0.2956 | 0.0327 | 0.0483 | 0.0262 | 0.0302 | 0.1261 | 0.1190 | 0.0200 | 0.4125 | 0.5598 | 0.1020 | 0.0066 |
| Lot.4   | 0.0336                                                       | 0.3686 | 0.3137 | 0.5792 | 0.0363 | 0.0259 | 0.0162 | 0.0189 | 0.1363 | 0.2080 | 0.0461 | 0.1703 | 0.5902 | 0.0660 | 0.0290 |
| Lot.5   | 0.0282                                                       | 0.2252 | 0.6253 | 0.6521 | 0.0122 | 0.0786 | 0.0235 | 0.0418 | 0.1640 | 0.2280 | 0.0482 | 0.4632 | 0.3516 | 0.0954 | 0.0102 |
| Lot.6   | 0.0227                                                       | 0.2323 | 0.5602 | 0.5891 | 0.0340 | 0.0380 | 0.0131 | 0.0142 | 0.1018 | 0.2265 | 0.0196 | 0.1923 | 0.4248 | 0.0481 | 0.0204 |
| Lot.7   | 0.0314                                                       | 0.3077 | 0.5171 | 0.6802 | 0.0294 | 0.0556 | 0.0257 | 0.0109 | 0.1840 | 0.1091 | 0.0401 | 0.4046 | 0.2362 | 0.0982 | 0.0276 |

|              |        |        |        |        |        |        |        |        |        |        |        |        |        |        |        |
|--------------|--------|--------|--------|--------|--------|--------|--------|--------|--------|--------|--------|--------|--------|--------|--------|
| Lot.8        | 0.0183 | 0.4217 | 0.2953 | 0.2743 | 0.0294 | 0.0522 | 0.0216 | 0.0349 | 0.1480 | 0.2465 | 0.0320 | 0.4126 | 0.5009 | 0.0511 | 0.0197 |
| Lot.9        | 0.0264 | 0.2617 | 0.5566 | 0.5166 | 0.0295 | 0.0625 | 0.0230 | 0.0258 | 0.2180 | 0.2082 | 0.0280 | 0.4135 | 0.2644 | 0.1041 | 0.0212 |
| Lot.10       | 0.0329 | 0.5138 | 0.2225 | 0.4865 | 0.0274 | 0.0295 | 0.0263 | 0.0153 | 0.1902 | 0.2002 | 0.0521 | 0.3616 | 0.5479 | 0.1061 | 0.0188 |
| <i>Aver.</i> | 0.0246 | 0.3415 | 0.4312 | 0.5033 | 0.0258 | 0.0481 | 0.0220 | 0.0231 | 0.1483 | 0.1973 | 0.0365 | 0.3536 | 0.3874 | 0.0878 | 0.0183 |

| Samples | Content of each compound in 10 batches of GZD samples (mg/g) |        |        |        |        |        |        |        |        |        |        |    |
|---------|--------------------------------------------------------------|--------|--------|--------|--------|--------|--------|--------|--------|--------|--------|----|
|         | No.                                                          | 31     | 32     | 33     | 34     | 35     | 36     | 37     | 38     | 39     | 40     | 41 |
| Lot.1   | 0.0786                                                       | 0.0389 | 0.0106 | 0.0066 | 0.0197 | 2.6935 | 0.0356 | 0.0194 | 0.0176 | 0.0082 | 0.0127 |    |
| Lot.2   | 0.1664                                                       | 0.0641 | 0.0220 | 0.0168 | 0.1555 | 6.7504 | 0.0494 | 0.0372 | 0.0289 | 0.0127 | 0.0124 |    |
| Lot.3   | 0.1041                                                       | 0.0473 | 0.0309 | 0.0511 | 0.0321 | 2.9903 | 0.0964 | 0.0464 | 0.0283 | 0.0107 | 0.0379 |    |
| Lot.4   | 0.1200                                                       | 0.0162 | 0.0074 | 0.0171 | 0.0190 | 6.1358 | 0.1093 | 0.0141 | 0.0127 | 0.0168 | 0.0122 |    |
| Lot.5   | 0.1431                                                       | 0.0363 | 0.0311 | 0.0056 | 0.0380 | 2.0267 | 0.0850 | 0.0312 | 0.0162 | 0.0081 | 0.0251 |    |
| Lot.6   | 0.0421                                                       | 0.0311 | 0.0108 | 0.0223 | 0.0180 | 5.2770 | 0.0589 | 0.0356 | 0.0107 | 0.0176 | 0.0116 |    |

---

|              |        |        |        |        |        |        |        |        |        |        |        |
|--------------|--------|--------|--------|--------|--------|--------|--------|--------|--------|--------|--------|
| Lot.7        | 0.1178 | 0.0157 | 0.0229 | 0.0213 | 0.0920 | 3.7570 | 0.0270 | 0.0210 | 0.0299 | 0.0351 | 0.0320 |
| Lot.8        | 0.0780 | 0.0344 | 0.0238 | 0.0083 | 0.0300 | 4.3225 | 0.0943 | 0.0271 | 0.0148 | 0.0142 | 0.0349 |
| Lot.9        | 0.2303 | 0.0363 | 0.0234 | 0.0203 | 0.0461 | 1.9177 | 0.1118 | 0.0277 | 0.0328 | 0.0072 | 0.0281 |
| Lot.10       | 0.1922 | 0.0439 | 0.0229 | 0.0230 | 0.0340 | 2.4565 | 0.0999 | 0.0573 | 0.0534 | 0.0075 | 0.0335 |
| <i>Aver.</i> | 0.1272 | 0.0364 | 0.0206 | 0.0192 | 0.0484 | 3.8327 | 0.0768 | 0.0317 | 0.0245 | 0.0154 | 0.0240 |

---
